# Supplementary material for: Antibiofilm and Antivirulence Properties of 6-Polyaminosteroid Derivatives against Antibiotic-Resistant Bacteria
Source: Antibiotics (Basel). 2023 Dec 20;13(1):8. doi: 10.3390/antibiotics13010008 (PMC10812528; doi:10.3390/antibiotics13010008)
Supplement: Supplementary file 1 [file antibiotics-13-00008-s001.zip › Supplementary Material 1_Tables S1-4.xlsx]

## Sheet: Supplementary Material 1
Supplementary Material 1
Antibiofilm and antivirulence properties of 6-polyaminosteroid derivatives against antibiotic-resistant bacteria
Delphine Vergoz1, Hung Le1, Benoit Bernay2, Annick Schaumann1, Magalie Barreau3, Flore Nilly3, Florie Desriac3, Ali Tahrioui3, Jean-Christophe Giard4, Olivier Lesouhaitier3, Sylvie Chevalier3, Jean Michel Brunel5, Cécile Muller3#, and Emmanuelle Dé1#
1 Univ Rouen Normandie, INSA Rouen Normandie, CNRS, Normandie Univ, PBS UMR 6270, F-76000 Rouen, France
2 Univ Caen Normandie, Proteogen Platform, US EMERODE, F-14000, Caen
3 Univ Rouen Normandie, Univ Caen Normandie, Normandie Univ, Communication Bacté-rienne et Stratégies Anti-infectieuses, CBSA UR4312, F-76000 Rouen
4 Univ Caen Normandie, INSERM, Normandie Univ, DYNAMICURE UMR 1311 F, 14000 Caen, France.
5 Aix Marseille Univ, INSERM, SSA, MCT, Marseille, France.
# Corresponding authors: Dr. Cécile Muller, cecile.muller@univ-caen.fr & Pr. Emmanuelle Dé, emmanuelle.de@univ-rouen.fr
Table S1: Proteins differentially expressed in CRAB after 4f treatment
Table S2: Proteins differentially expressed in CRPA after 4f treatment
Table S3: Proteins differentially expressed in VRE after 4f treatment
Table S4: Proteins differentially expressed in MRSA after 4f treatment

## Sheet: Table S1
Table S1: Proteins differentially expressed in CRAB after 4f treatment
Accession	GenBank gene accession	Fold change	Log2 fold change	Anova (p)	­Log10 p-value	Gene name	Product name	Expression in 4f treatment
ABYAL3560	A1S_2996	7.78065	2.95989	5.2309e-05	4.28142		conserved exported protein of unknown function	Up-regulated
ABYAL2001	A1S_1679	5.7868	2.53276	4.29638e-07	6.3669		YARHG domain-containing protein	Up-regulated
ABYAL3933	A1S_3343	5.0125	2.32553	0.000676349	3.16983		exported protein of unknown function	Up-regulated
ABYAL2091	A1S_1752	4.47189	2.16088	8.17838e-08	7.08733		multidrug efflux pump membrane fusion lipoprotein AcrA (fragment)	Up-regulated
ABYAL2090	A1S_1751	4.05064	2.01815	3.87703e-07	6.4115		AdeA membrane fusion protein	Up-regulated
ABYAL0561	A1S_0526	3.36262	1.74959	3.53868e-06	5.45116		Excinuclease	Up-regulated
ABYAL2345	A1S_1971	2.62649	1.39313	0.00141649	2.84879	dxr	1-deoxy-D-xylulose 5-phosphate reductoisomerase	Up-regulated
ABYAL2022	A1S_1693	2.3624	1.24026	0.0201649	1.6954	prmB	50S ribosomal subunit protein L3 N(5)-glutamine methyltransferase	Up-regulated
ABYAL3385	A1S_2861	2.02891	1.0207	0.000937786	3.0279		Signal peptide	Up-regulated
ABYAL2356	A1S_1982	1.95828	0.969587	0.00685568	2.16395	ispF	2-C-methyl-D-erythritol 2,4-cyclodiphosphate synthase	Up-regulated
ABYAL0813	A1S_0683	1.90573	0.930347	0.0174213	1.75892	hpf	Ribosome hibernation promoting factor	Up-regulated
ABYAL0451	A1S_0421	1.84153	0.880908	0.0130658	1.88386	infA	translation initiation factor IF-1	Up-regulated
ABYAL3667	A1S_3100	1.81017	0.856127	0.000908805	3.04153		Putative toluene tolerance protein (Ttg2D)	Up-regulated
ABYAL1026	A1S_0886	1.76663	0.821004	0.0149343	1.82581	dut	deoxyuridine triphosphatase	Up-regulated
ABYAL2804	A1S_2336	1.71759	0.780389	0.000912212	3.0399	rsmE	Ribosomal RNA small subunit methyltransferase E	Up-regulated
ABYAL2616	A1S_2171	1.70231	0.767498	0.0500375	1.3007	rpsF	30S ribosomal subunit protein S6	Up-regulated
ABYAL1461	A1S_1237	1.69578	0.761953	0.0278313	1.55547	kdsC	3-deoxy-D-manno-octulosonate 8-phosphate phosphatase KdsC	Up-regulated
ABYAL0146	A1S_0125	1.68013	0.748575	0.0026673	2.57393		conserved exported protein of unknown function	Up-regulated
ABYAL1739	A1S_1476	1.66896	0.738952	0.00215784	2.66598		Tautomerase	Up-regulated
ABYAL3689	A1S_3880	1.66685	0.73712	0.0036533	2.43731		conserved protein of unknown function	Up-regulated
ABYAL3198	A1S_2683	1.66233	0.733207	0.011957	1.92238		CRS1 / YhbY domain protein	Up-regulated
ABYAL3031	A1S_2543	1.66014	0.731305	0.00137134	2.86286		conserved exported protein of unknown function	Up-regulated
ABYAL3596	A1S_3034	1.64878	0.721397	0.00709353	2.14914		conserved exported protein of unknown function	Up-regulated
ABYAL2811	A1S_2343	1.6475	0.720276	0.0421448	1.37526	sodB	superoxide dismutase (Fe)	Up-regulated
ABYAL3113	A1S_2609	1.64242	0.715825	0.000306147	3.51407		Lipid A biosynthesis lauroyl acyltransferase	Up-regulated
ABYAL0317	A1S_0292	1.64233	0.715747	0.0154846	1.8101		Outer membrane protein W precursor	Up-regulated
ABYAL3861	A1S_3278	1.57236	0.652935	0.0199332	1.70042	ycaC	putative hydrolase	Up-regulated
ABYAL1384	A1S_1178	1.56513	0.646286	0.000241542	3.61701	hisZ	ATP phosphoribosyltransferase regulatory subunit	Up-regulated
ABYAL0398	A1S_0370	1.54469	0.62732	0.00492721	2.3074	xcpT	Type II secretion system core protein G	Up-regulated
ABYAL3187	A1S_2672	1.51764	0.601828	0.00899007	2.04624		conserved exported protein of unknown function	Up-regulated
ABYAL1756	A1S_1490	1.51642	0.600669	0.0111593	1.95236	gltI	glutamate/aspartate ABC transporter periplasmic binding protein	Up-regulated
ABYAL1314	A1S_1139	1.51073	0.595244	0.00668181	2.17511		conserved exported protein of unknown function	Up-regulated
ABYAL3988	A1S_3389	1.50716	0.591835	0.0280751	1.55168	ribE	6,7-dimethyl-8-ribityllumazine synthase	Up-regulated
ABYAL1562	A1S_1321	1.4816	0.567158	0.0128743	1.89028		conserved exported protein of unknown function	Up-regulated
ABYAL0895	A1S_0759	1.47955	0.565155	0.023844	1.62262	nuoI	NADH:quinone oxidoreductase subunit I	Up-regulated
ABYAL3648	A1S_3083	1.47743	0.563091	0.0161802	1.79102		Cystathionine beta-lyase	Up-regulated
ABYAL1732	A1S_1470	1.47675	0.562422	0.0207372	1.68325	gpo	Glutathione peroxidase	Up-regulated
ABYAL2011	A1S_1684	1.46933	0.555159	0.0203259	1.69195	ybaB	putative nucleoid-associated protein YbaB	Up-regulated
ABYAL0885	A1S_0750	1.46564	0.551535	0.0283265	1.54781		conserved protein of unknown function	Up-regulated
ABYAL1387	A1S_1180	1.45643	0.542437	0.0272215	1.56509		Peptidase M48 family protein	Up-regulated
ABYAL3248	A1S_2729	1.45248	0.538515	0.00449329	2.34744	lolA	Outer-membrane lipoprotein carrier protein	Up-regulated
ABYAL0986	A1S_0845	1.44816	0.534225	0.0185019	1.73278	coaD	pantetheine-phosphate adenylyltransferase	Up-regulated
ABYAL0417	A1S_0390	1.44504	0.531113	0.0147785	1.83037		HopJ type III effector protein	Up-regulated
ABYAL2499	A1S_2072	1.44444	0.530513	0.00559642	2.25209		Universal stress protein	Up-regulated
ABYAL3356	A1S_2834	1.43501	0.521056	0.00449541	2.34723	mscL	Large-conductance mechanosensitive channel	Up-regulated
ABYAL2912	A1S_2434	1.43356	0.519598	0.021848	1.66059		conserved exported protein of unknown function	Up-regulated
ABYAL2243	A1S_1879	1.42434	0.510289	0.0239922	1.61993		conserved protein of unknown function	Up-regulated
ABYAL2546	A1S_2111	1.42167	0.507592	0.00290795	2.53641	nfsB	Oxygen-insensitive NAD(P)H nitroreductase	Up-regulated
ABYAL0174	A1S_0151	1.42137	0.50728	0.00434717	2.36179	atpF	ATP synthase Fo complex subunit b	Up-regulated
ABYAL0521	A1S_0486	1.42111	0.507016	0.0163166	1.78737	idnK	D-gluconate kinase, thermosensitive	Up-regulated
ABYAL1936	A1S_1619	1.41914	0.505012	0.0208408	1.68109	rraA	ribonuclease E inhibitor protein A	Up-regulated
ABYAL1926	A1S_1610	0.458247	-1.1258	0.00846339	2.07246		Zn-dependent oligopeptidase	Down-regulated
ABYAL4007	A1S_3405	0.497863	-1.00618	0.006526	2.18535	hutH	Histidine ammonia-lyase	Down-regulated
ABYAL0909	A1S_0771	0.500804	-0.997683	0.00207343	2.68331		conserved membrane protein of unknown function	Down-regulated
ABYAL0402	A1S_0375	0.527129	-0.923773	0.00881792	2.05463	ybeX	CorC-HlyC family protein YbeX	Down-regulated
ABYAL1006	A1S_0866	0.604949	-0.725115	0.00132753	2.87695	rpsL	30S ribosomal subunit protein S12	Down-regulated
ABYAL1473	A1S_1249	0.613625	-0.704571	0.01662	1.77937		Ferredoxin 1	Down-regulated
ABYAL3373	A1S_2849	0.628976	-0.668924	9.93791e-05	4.00271	oprB	Porin B	Down-regulated
ABYAL3632	A1S_3068	0.63483	-0.655559	0.017445	1.75833	rpsN	30S ribosomal subunit protein S14	Down-regulated
ABYAL3642	A1S_3077	0.637259	-0.650049	0.0242628	1.61506	rplB	50S ribosomal subunit protein L2	Down-regulated
ABYAL2700	A1S_2245	0.643139	-0.636798	0.00696762	2.15692	rpsU	30S ribosomal subunit protein S21	Down-regulated
ABYAL3638	A1S_3074	0.657661	-0.604585	0.0074225	2.12945	rplP	50S ribosomal subunit protein L16	Down-regulated
ABYAL4055	A1S_3447	0.661596	-0.595978	0.00489497	2.31025		putative RND efflux membrane fusion protein	Down-regulated
ABYAL3938	A1S_3348	0.669487	-0.578872	0.000362366	3.44085		conserved exported protein of unknown function	Down-regulated
ABYAL3275	A1S_2753	0.676973	-0.56283	0.00106422	2.97297		DcaP-like protein	Down-regulated
ABYAL1184	A1S_1026	0.688904	-0.537625	0.0187012	1.72813	gdhA	glutamate dehydrogenase	Down-regulated
ABYAL3621	A1S_3057	0.695685	-0.523495	0.00656895	2.1825	rpsD	30S ribosomal subunit protein S4	Down-regulated
ABYAL3750	A1S_3175	0.697938	-0.51883	0.0105058	1.97857	bfr	bacterioferritin	Down-regulated
ABYAL0637	A1S_0597	0.703393	-0.507596	0.013495	1.86983	rplT	50S ribosomal subunit protein L20	Down-regulated

## Sheet: Table S2
Table S2: Proteins differentially expressed in CRPA after 4f treatment
Accession	Fold change	Log2 fold change	Anova (p)	­Log10 p-value	Gene name	Product name	PseudoCAP function class	Expression in 4f treatment
PA4414	1.85187	0.888983	0.025571	1.59225	murD	UDP-N-acetylmuramoylalanine--D-glutamate ligase	Cell wall / LPS / capsule	Up-regulated
PA3556	1.64755	0.720322	0.00342157	2.46577	arnT	inner membrane L-Ara4N transferase ArnT	Adaptation, protection;Cell wall / LPS / capsule;Membrane proteins	Up-regulated
PA1560	1.58877	0.667912	0.00105232	2.97785		hypothetical protein	Hypothetical, unclassified, unknown	Up-regulated
PA3030	1.57046	0.651183	0.000618928	3.20836	mobA	molybdopterin-guanine dinucleotide biosynthesis protein MobA	Biosynthesis of cofactors, prosthetic groups and carriers	Up-regulated
PA4154	1.55255	0.634638	0.00459426	2.33778		conserved hypothetical protein	Hypothetical, unclassified, unknown	Up-regulated
PA1559	1.54296	0.625701	0.0483207	1.31587		hypothetical protein	Hypothetical, unclassified, unknown	Up-regulated
PA3569	0.703589	-0.507194	0.00471336	2.32667	mmsB	3-hydroxyisobutyrate dehydrogenase	Carbon compound catabolism	Down-regulated
PA3535	0.700027	-0.514518	0.00874857	2.05806		probable serine protease	Putative enzymes	Down-regulated
PA5074	0.69912	-0.516389	0.0160243	1.79522		probable ATP-binding component of ABC transporter	Transport of small molecules	Down-regulated
PA5047	0.697139	-0.520483	0.00807363	2.09293		hypothetical protein	Hypothetical, unclassified, unknown	Down-regulated
PA1375	0.69423	-0.526514	0.00883443	2.05382	pdxB	erythronate-4-phosphate dehydrogenase	Amino acid biosynthesis and metabolism;Biosynthesis of cofactors, prosthetic groups and carriers;Carbon compound catabolism	Down-regulated
PA1665	0.683852	-0.548244	0.0232104	1.63432	fha2	Fha2	Protein secretion/export apparatus	Down-regulated
PA2760	0.683765	-0.548428	0.00623209	2.20537	oprQ	OprQ	Antibiotic resistance and susceptibility;Motility & Attachment;Transport of small molecules	Down-regulated
PA0743	0.679694	-0.557042	0.0346155	1.46073		probable 3-hydroxyisobutyrate dehydrogenase	Carbon compound catabolism	Down-regulated
PA5374	0.658893	-0.601883	0.0359029	1.44487	betI	transcriptional regulator BetI	Transcriptional regulators	Down-regulated
PA0595	0.654983	-0.61047	0.0299501	1.5236	lptD	LPS-assembly protein LptD	Adaptation, protection	Down-regulated
PA5112	0.622616	-0.683585	0.0250953	1.60041	estA	esterase EstA	Fatty acid and phospholipid metabolism;Motility & Attachment;Protein secretion/export apparatus;Secreted Factors (toxins, enzymes, alginate)	Down-regulated
PA4110	0.622186	-0.684583	0.0295929	1.52881	ampC	beta-lactamase precursor	Adaptation, protection;Adaptation, protection;Adaptation, protection;Adaptation, protection	Down-regulated
PA5502	0.61469	-0.70207	0.0294861	1.53038		hypothetical protein	Hypothetical, unclassified, unknown	Down-regulated
PA4067	0.607146	-0.719885	0.00985192	2.00648	oprG	Outer membrane protein OprG precursor	Membrane proteins	Down-regulated
PA0162	0.601337	-0.733755	0.0105022	1.97872	opdC	histidine porin OpdC	Membrane proteins;Transport of small molecules	Down-regulated
PA3242	0.589523	-0.76238	0.00851651	2.06974	htrB2	temperature-regulated acyltransferase HtrB1	Cell wall / LPS / capsule	Down-regulated
PA3186;PA2291	0.588082	-0.76591	0.00307335	2.51239	oprB	Glucose/carbohydrate outer membrane porin OprB precursor	Transport of small molecules	Down-regulated
PA4520	0.577754	-0.791473	0.0044762	2.34909		probable chemotaxis transducer	Adaptation, protection;Chemotaxis	Down-regulated
PA4502	0.576165	-0.795447	0.00783837	2.10577	dppA4	probable binding protein component of ABC transporter	Transport of small molecules	Down-regulated
PA2793	0.575161	-0.797963	0.0381745	1.41823		hypothetical protein	Hypothetical, unclassified, unknown	Down-regulated
PA1334	0.568832	-0.813926	0.0112499	1.94885		probable oxidoreductase	Putative enzymes	Down-regulated
PA3322	0.531719	-0.911265	0.0395195	1.40319		hypothetical protein	Hypothetical, unclassified, unknown	Down-regulated
PA4607	0.521852	-0.938288	0.00744888	2.12791		hypothetical protein	Hypothetical, unclassified, unknown	Down-regulated
PA0535	0.510092	-0.971171	0.0438827	1.35771		probable transcriptional regulator	Transcriptional regulators	Down-regulated
PA1178	0.471226	-1.08551	0.00843045	2.07415	oprH	PhoP/Q and low Mg2+ inducible outer membrane protein H1 precursor	Adaptation, protection;Membrane proteins;Transport of small molecules	Down-regulated
PA4041	0.470334	-1.08824	0.00651632	2.186		hypothetical protein	Putative enzymes	Down-regulated
PA0755	0.448618	-1.15644	0.00357741	2.44643	opdH	cis-aconitate porin OpdH	Membrane proteins;Transport of small molecules	Down-regulated
PA5452	0.302746	-1.72382	0.00012001	3.92078	wbpW	phosphomannose isomerase/GDP-mannose WbpW	Cell wall / LPS / capsule	Down-regulated

## Sheet: Table S3
Table S3: Proteins differentially expressed in VRE after 4f treatment
Accession	Fold change	Log2 fold change	Anova (p)	­Log10 p-value	Gene name	Product name	Expression in 4f treatment
UPI000037FBAB	7.58711	2.92355	0.00225348	-2.64715	OK7_04834	YxeA family protein	Up-regulated
UPI00003C538F	4.7796	2.25689	0.00555359	-2.25543	SMG_00524	Methylated-DNA--protein-cysteine methyltransferase (EC 2.1.1.63) (6-O-methylguanine-DNA methyltransferase) (MGMT) (O-6-methylguanine-DNA-alkyltransferase)	Up-regulated
UPI0000380003	4.17319	2.06115	0.0416678	-1.3802	OK7_04740	dUTP diphosphatase	Up-regulated
UPI000037F8D0	3.22163	1.68779	0.0157397	-1.803	dltC OK7_05586	D-alanyl carrier protein (DCP) (D-alanine--poly(phosphoribitol) ligase subunit 2)	Up-regulated
UPI000037F60E	3.13399	1.648	0.000686198	-3.16355	AWT83_11985 CUS10_03765 DKP91_11620 DPX29_08465 EB12_00839 EB44_00829 HV425_11160	KR domain-containing protein (NAD(P)-dependent dehydrogenase) (NAD(P)-dependent oxidoreductase) (SDR family NAD(P)-dependent oxidoreductase) (SDR family oxidoreductase) (Short chain dehydrogenase/reductase family oxidoreductase)	Up-regulated
UPI000037FBCB	2.89146	1.5318	0.00956984	-2.0191	I131_01745	Cystathionine beta-lyase (EC 2.5.1.48)	Up-regulated
UPI000037FBAC	2.81294	1.49208	0.0146222	-1.83499	OK7_04833	ABC transporter ATP-binding protein	Up-regulated
UPI0000380005	2.38196	1.25215	0.0222333	-1.653	proA OK7_04738	Gamma-glutamyl phosphate reductase (GPR) (EC 1.2.1.41) (Glutamate-5-semialdehyde dehydrogenase) (Glutamyl-gamma-semialdehyde dehydrogenase) (GSA dehydrogenase)	Up-regulated
UPI0000541376	2.34925	1.2322	0.00388549	-2.41055	SMG_01492	Carbonic anhydrase	Up-regulated
UPI0001B6F78E	2.02009	1.01442	0.0048542	-2.31388	OK7_03316	ATP-dependent Zn protease	Up-regulated
UPI000037FB8A	1.85227	0.889297	0.0343798	-1.4637	HMPREF1345_01989	Transcriptional regulatory protein WalR	Up-regulated
UPI000037FD49	1.8275	0.86987	0.0243081	-1.61425	HMPREF1345_01529	FeS assembly protein SufB	Up-regulated
UPI000037F8BC	1.70985	0.77387	0.0284575	-1.5458	OK7_03683	Hydroxymethylglutaryl-CoA synthase	Up-regulated
UPI0001B8FF81	1.61627	0.692669	0.0126344	-1.89845	OK7_03827	Cell division protein FtsX	Up-regulated
UPI00003C508F	1.59744	0.675759	0.00505851	-2.29598	pcp HMPREF1345_01324	Pyrrolidone-carboxylate peptidase (EC 3.4.19.3) (5-oxoprolyl-peptidase) (Pyroglutamyl-peptidase I) (PGP-I) (Pyrase)	Up-regulated
UPI0001CEA4F9	1.52593	0.609689	0.0351944	-1.45353	SMG_01707	Aldose 1-epimerase	Up-regulated
UPI000037F70A	1.46631	0.552191	0.0223582	-1.65056	OK7_05588	M42 glutamyl aminopeptidase	Up-regulated
UPI00003C5059	1.42571	0.511677	0.0121262	-1.91628	HMPREF1345_01494	Uncharacterized protein	Up-regulated
UPI000037FF05	1.42564	0.511608	0.0308655	-1.51053	rnj OIE_05025	Ribonuclease J (RNase J) (EC 3.1.-.-)	Up-regulated
UPI0001B6E361	0.6723	-0.572822	0.00933346	-2.02996	der OK7_03648	GTPase Der (GTP-binding protein EngA)	Down-regulated
UPI0001B6E228	0.670275	-0.577174	0.0494206	-1.30609	purE OK7_03551	N5-carboxyaminoimidazole ribonucleotide mutase (N5-CAIR mutase) (EC 5.4.99.18) (5-(carboxyamino)imidazole ribonucleotide mutase)	Down-regulated
UPI000037F8CC	0.608938	-0.715633	0.014066	-1.85183	SMG_00591	Deoxynucleoside kinase	Down-regulated
UPI0000543C56	0.592675	-0.754688	0.0296774	-1.52757	OK7_04412	Universal bacterial protein YeaZ	Down-regulated
UPI0001B6F746	0.54142	-0.885179	0.0019104	-2.71888	UA3_00902	PTS system mannose/fructose/sorbose-specific IIC component	Down-regulated
UPI00019CCBC7	0.528433	-0.920207	0.0237736	-1.62391	nusG HMPREF1345_01379	Transcription termination/antitermination protein NusG	Down-regulated
UPI00003C51B6	0.511382	-0.967528	0.0119039	-1.92431	nrdR HMPREF1345_02242	Transcriptional repressor NrdR	Down-regulated
UPI0001B6ED57	0.493062	-1.02016	0.0275304	-1.56019	SMG_01423	Cyclopropane-fatty-acyl-phospholipid synthase	Down-regulated
UPI0001B6EE0A	0.444726	-1.16901	0.0189893	-1.72149	SMG_01979	Sodium/dicarboxylate symporter family protein	Down-regulated
UPI00003C53AF	0.400077	-1.32165	0.00636645	-2.1961	SMG_00256	Glycosyl transferase	Down-regulated
UPI00003C530C	0.346811	-1.52778	0.010683	-1.97131	HMPREF1348_01895	Choline ABC transporter, ATP-binding protein OpuBA	Down-regulated
UPI0001B6F1B5	0.334037	-1.58192	0.00830932	-2.08043	AWT83_17060 B1P95_13350 GBM44_15285 GBM73_16245	Peptidase C60 (Sortase)	Down-regulated
UPI00003C512C	0.293258	-1.76976	0.00967375	-2.01441	SMG_00976	Glycine betaine ABC transporter substrate-binding protein	Down-regulated
UPI000037F662	0.260301	-1.94175	0.0033913	-2.46963	SMG_00607	Na+/H+ antiporter NhaC	Down-regulated
UPI000037F707	0.108761	-3.20077	0.0261468	-1.58258	OK7_05591	lipoate--protein ligase (EC 6.3.1.20)	Down-regulated

## Sheet: Table S4
Table S4: Proteins differentially expressed in MRSA after 4f treatment
Accession	Fold change	Log2 fold change	Anova (p)	­Log10 p-value	Gene name	Product name	Expression in 4f treatment
Q8NX96|ATL_STAAW	8.45011	3.07897	0.033588	1.47382	atl nag MW0936	Bifunctional autolysin	Up-regulated
A0A0H3K1M3|A0A0H3K1M3_STAAW	4.25506	2.08918	8.56467e-05	4.06729	MW0153	Putative long chain fatty acid-CoA ligase VraA	Up-regulated
A0A0H3JZ85|A0A0H3JZ85_STAAW	3.64455	1.86574	0.0425114	1.37149	MW0676	MW0676 protein	Up-regulated
A0A0H3K2B5|A0A0H3K2B5_STAAW	3.35571	1.74662	0.0113447	1.94521	queE MW0672	7-carboxy-7-deazaguanine synthase	Up-regulated
Q7A0C5|ATPG_STAAW	2.17477	1.12086	1.02913e-05	4.98753	atpG MW2028	ATP synthase gamma chain	Up-regulated
A0A0H3JWP7|A0A0H3JWP7_STAAW	2.15885	1.11026	0.000337422	3.47183	recN	DNA repair protein RecN	Up-regulated
A0A0H3JVV9|A0A0H3JVV9_STAAW	1.96098	0.971575	0.0294447	1.53099	ribC	Riboflavin biosynthesis protein	Up-regulated
Q8NUK9|ARCR_STAAW	1.83262	0.873908	0.0132855	1.87662	arcR MW2552	HTH-type transcriptional regulator ArcR	Up-regulated
A0A0H3JU74|A0A0H3JU74_STAAW	1.82387	0.867006	0.00389443	2.40956	MW0214	DUF488 domain-containing protein	Up-regulated
A0A0H3K2R1|A0A0H3K2R1_STAAW	1.78267	0.834036	0.0399957	1.39799	MW1037	Fibrinogen-binding protein	Up-regulated
A0A0H3JYU6|A0A0H3JYU6_STAAW	1.76516	0.8198	0.0380599	1.41953	gltD	NADH-glutamate synthase small subunit	Up-regulated
A0A0R4J6I1|A0A0R4J6I1_STAAW	1.71187	0.775569	0.0497179	1.30349	binL	DNA-invertase	Up-regulated
A0A0H3K1V0|A0A0H3K1V0_STAAW	1.69372	0.760196	0.00573698	2.24132	MW0329	MW0329 protein	Up-regulated
Q7A0U9|DBH_STAAW	1.67474	0.743938	0.0460175	1.33708	hup MW1362	DNA-binding protein HU	Up-regulated
A0A0H3JZU4|A0A0H3JZU4_STAAW	1.63695	0.711007	0.0213473	1.67066	priA	Primosomal protein N'	Up-regulated
A0A0H3JVX5|A0A0H3JVX5_STAAW	1.62291	0.698587	0.0451534	1.34531	glpP	Glycerol uptake operon antiterminator regulatory protein	Up-regulated
A0A0H3JWG9|A0A0H3JWG9_STAAW	1.57722	0.657382	0.0240075	1.61965	MW0808	DUF1027 domain-containing protein	Up-regulated
A0A0H3JYL3|A0A0H3JYL3_STAAW	1.57526	0.655591	0.0124313	1.90548	MW0315	Bac_luciferase domain-containing protein	Up-regulated
P68868|DNAA_STAAW	1.54029	0.623205	0.0024645	2.60827	dnaA MW0001	Chromosomal replication initiator protein DnaA	Up-regulated
Q8NWY8|FTSK_STAAW	1.5206	0.604643	0.0453724	1.34321	ftsK MW1159	DNA translocase FtsK	Up-regulated
Q7A071|SARV_STAAW	1.48572	0.571159	0.022805	1.64197	sarV MW2185	HTH-type transcriptional regulator SarV	Up-regulated
A0A0H3JV98|A0A0H3JV98_STAAW	1.45455	0.540569	0.0116063	1.93531	MW0577	Exported protein	Up-regulated
Q7A105|GLPD_STAAW	1.41935	0.505228	0.0234619	1.62964	glpD MW1184	Aerobic glycerol-3-phosphate dehydrogenase	Up-regulated
A0A0H3JV92|A0A0H3JV92_STAAW	0.703278	-0.507833	0.0316455	1.49969	MW0565	N-acetyltransferase domain-containing protein	Down-regulated
Q8NVH5|THIE_STAAW	0.662777	-0.593405	0.00743386	2.12879	thiE MW2014	Thiamine-phosphate synthase	Down-regulated
A0A0H3JV96|A0A0H3JV96_STAAW	0.644561	-0.633611	0.0186693	1.72887	MW0812	MW0812 protein	Down-regulated
A0A0H3K1B3|A0A0H3K1B3_STAAW	0.627436	-0.67246	0.0459888	1.33735	MW2226	MW2226 protein	Down-regulated
A0A0H3K1C1|A0A0H3K1C1_STAAW	0.601139	-0.734229	0.0252556	1.59764	MW2237	MW2237 protein	Down-regulated
A0A0H3JUW2|A0A0H3JUW2_STAAW	0.575538	-0.797018	0.0270906	1.56718	lctP	L-lactate permease	Down-regulated
Q8NWQ3|DHA1_STAAW	0.56808	-0.815835	0.046791	1.32984	ald1 MW1328	Alanine dehydrogenase 1	Down-regulated
A0A0H3K4M0|A0A0H3K4M0_STAAW	0.554701	-0.850218	0.0454498	1.34247	MW2439	Ring-cleaving dioxygenase	Down-regulated
A0A0H3K258|A0A0H3K258_STAAW	0.543665	-0.879211	0.000340041	3.46847	MW0570	DUF1934 family protein	Down-regulated
A0A0H3JW97|A0A0H3JW97_STAAW	0.532081	-0.910283	0.00549649	2.25991	MW1204	Phage protein	Down-regulated
A0A0H3JW99|A0A0H3JW99_STAAW	0.530658	-0.914147	0.00247069	2.60718	MW0704	MW0704 protein	Down-regulated
A0A0H3K411|A0A0H3K411_STAAW	0.493113	-1.02001	0.0219453	1.65866	kdpD	histidine kinase	Down-regulated
A0A0H3JY49|A0A0H3JY49_STAAW	0.485364	-1.04286	0.0353319	1.45183	narI	Nitrate reductase gamma chain	Down-regulated
A0A0H3JYW0|A0A0H3JYW0_STAAW	0.448522	-1.15675	0.00515572	2.28771	veg	Veg protein	Down-regulated
Q8NYI0|TARI2_STAAW	0.437353	-1.19313	0.0231258	1.6359	tarI2 MW0227	Ribitol-5-phosphate cytidylyltransferase 2	Down-regulated
Q8NVZ8|PCKA_STAAW	0.114532	-3.12618	0.00138738	2.8578	pckA MW1729	Phosphoenolpyruvate carboxykinase (ATP)	Down-regulated
A0A0H3JY26|A0A0H3JY26_STAAW	0.0212062	-5.55937	9.19749e-07	6.03633	MW2273	MW2273 protein	Down-regulated
